# Supplementary material
Source: PubMed Central journal article supplement (PMC4528341)
Supplement: peds.2012-0175_peds.2012-0175SupplementaryData.pdf [file peds.2012-0175_peds.2012-0175SupplementaryData.pdf]

# Supplemental Information

**SUPPLEMENTAL TABLE 3** Diagnostic Codes Used in Construction of Study Cohort

|                                    |                                                                                                                                                                                                                                                                                                                                                                                                                                                                                                                                                                                                                                                                                                                                      |
|------------------------------------|--------------------------------------------------------------------------------------------------------------------------------------------------------------------------------------------------------------------------------------------------------------------------------------------------------------------------------------------------------------------------------------------------------------------------------------------------------------------------------------------------------------------------------------------------------------------------------------------------------------------------------------------------------------------------------------------------------------------------------------|
| NI                                 | Q00, Q05, Q01, Q02, Q03, Q04, Q062, Q064, Q068, Q069, Q078, Q079, F700, F701, F708, F709, F71, F72, F73, F78, F79, G20, G23, G240, G241, G242, G248, G250, G251, G252, G253, G254, G255, G256, G318, G319, G901, G903, G904, G10, G80, G11, G12, G95, G99, G91, G940, G941, G942, G82, G81, G40, G41, G71, G72, Q90, F842, Q910, Q911, Q912, Q913, Q93, Q953, Q958, Q92, Q97, Q985, Q986, Q987, Q988, Q989, Q990, Q992                                                                                                                                                                                                                                                                                                               |
| CCCs                               |                                                                                                                                                                                                                                                                                                                                                                                                                                                                                                                                                                                                                                                                                                                                      |
| Cardiovascular                     | Q20, Q21, Q22, Q23, Q24, Q25, Q26, I420, I421, I422, I423, I424, I425, I427, I428, I429, I515, I44, I45, I47, I48, I49                                                                                                                                                                                                                                                                                                                                                                                                                                                                                                                                                                                                               |
| Respiratory                        | Q30, Q31, Q32, Q33, Q34, P27, E84                                                                                                                                                                                                                                                                                                                                                                                                                                                                                                                                                                                                                                                                                                    |
| Renal                              | Q60, Q61, Q62, Q63, Q64, N18                                                                                                                                                                                                                                                                                                                                                                                                                                                                                                                                                                                                                                                                                                         |
| Gastrointestinal                   | Q39, Q41, Q42, Q431, Q437, Q44, Q45, K73, K74, K754, K758, K759, K760, K50, K51                                                                                                                                                                                                                                                                                                                                                                                                                                                                                                                                                                                                                                                      |
| Hematology and immunodeficiency    | D570, D571, D572, D578, D58, D55, D561, D562, D564, D568, D80, D81, D82, D83, D84, D898, D899, B20, B21, B22, B23, B24                                                                                                                                                                                                                                                                                                                                                                                                                                                                                                                                                                                                               |
| Metabolic                          | E70, E710, E711, E712, E72, E74, E730, E78, E77, E75, E881, E882, E85, E76, E83, E79, E803, E804, E805, E806, E807, E713, E88.8, E88.9                                                                                                                                                                                                                                                                                                                                                                                                                                                                                                                                                                                               |
| Other congenital or genetic defect | Q914, Q915, Q916, Q917, Q952, Q96, Q980, Q981, Q982, Q984, Q999, E34, M41, Q75, Q76, Q77, Q78, Q790, Q791, Q792, Q793, Q794, Q795, K44, Q897, Q898, Q899, Q87                                                                                                                                                                                                                                                                                                                                                                                                                                                                                                                                                                        |
| Malignancy                         | C00, C01, C02, C03, C04, C05, C06, C07, C08, C09, C10, C11, C12, C13, C14, C15, C16, C17, C18, C19, C20, C21, C22, C23, C24, C25, C26, C30, C31, C32, C33, C34, C35, C36, C37, C38, C39, C40, C41, C43, C44, C45, C46, C47, C48, C49, C50, C51, C52, C53, C54, C55, C56, C57, C58, C60, C61, C62, C63, C64, C65, C66, C67, C68, C69, C70, C71, C72, C73, C74, C75, C76, C77, C78, C79, C80, C81, C82, C83, C84, C85, C86, C87, C88, C89, C90, C91, C92, C93, C94, C95, C96, C97, D00, D01, D02, D03, D04, D05, D06, D07, D08, D09, D10, D11, D12, D13, D14, D15, D16, D17, D18, D19, D20, D21, D22, D23, D24, D25, D26, D27, D28, D29, D30, D31, D32, D33, D34, D35, D36, D37, D38, D39, D40, D41, D42, D43, D44, D45, D46, D47, D48 |
| TA <sup>a</sup>                    | K9140, K9141, K9142, K9149, J9500, J9501, J9502, J9503, J9508, J9509, Z459, Z930, Z931, Z932, Z933, Z935, Z936, Z430, Z431, Z432, Z433, Z435, Z436, Z491, Z492, Z992, Z465, Z950, Z96, T823, T824, V440, <sup>b</sup> V441, <sup>b</sup> V442, <sup>b</sup> V443, <sup>b</sup> V445, <sup>b</sup> V446, <sup>b</sup> V450, <sup>b</sup> V451, <sup>b</sup> V530, <sup>b</sup> V535, <sup>b</sup> V550, <sup>b</sup> V551, <sup>b</sup> V552, <sup>b</sup> V553, <sup>b</sup> V555, <sup>b</sup> V556, <sup>b</sup> V560, <sup>b</sup> V568, <sup>b</sup> 5190, <sup>b</sup> 5696, <sup>b</sup> 9961 <sup>b</sup>                                                                                                                     |

All codes are from ICD-10 unless indicated otherwise.

<sup>a</sup> TA defined as a diagnostic or procedure code indicating insertion of a medical device without record of subsequent removal. Procedural codes obtained from Canadian Classification of Procedures until 2002, then Canadian Classification of Interventions; codes available from authors on request.

<sup>b</sup> *International Classification of Diseases, 9th Revision.*

**SUPPLEMENTAL TABLE 4** Distribution of Health System Costs Over 2 Years After Index Hospitalization by Diagnosis Type

|                                                         | Overall<br><i>n</i> = 15 771 | NI                      |                      | Multiple CCC             |                         | Single CCC              |                      |
|---------------------------------------------------------|------------------------------|-------------------------|----------------------|--------------------------|-------------------------|-------------------------|----------------------|
|                                                         |                              | TA                      | No TA                | TA                       | No TA                   | TA                      | No TA                |
|                                                         |                              | <i>n</i> = 873          | <i>n</i> = 3495      | <i>n</i> = 152           | <i>n</i> = 911          | <i>n</i> = 838          | <i>n</i> = 9502      |
| Total health system cost                                |                              |                         |                      |                          |                         |                         |                      |
| Total cost                                              | 838 824 141                  | 90 487 947              | 121 858 688          | 28 036 250               | 116 697 804             | 90 069 064              | 391 674 387          |
| Mean ± SD                                               | 53 188 ± 100 229             | 103 652 ± 148 867       | 34 867 ± 60 375      | 184 449 ± 193 388        | 128 099 ± 155 661       | 107 481 ± 180 709       | 41 220 ± 77 029      |
| Median (IQR)                                            | 17 372 (7002–56 017)         | 52 482 (20 173–128 371) | 13 815 (6536–36 792) | 119 400 (36 424–269 536) | 87 870 (26 622–177 327) | 49 159 (18 481–122 807) | 13 887 (5841–41 991) |
| Total cost (excluding index hospitalization)            |                              |                         |                      |                          |                         |                         |                      |
| No. of users (% cohort)                                 | 15 608 (99)                  | 869 (99.5)              | 3441 (98.5)          | 148 (97.4)               | 899 (98.7)              | 830 (99)                | 9421 (99.1)          |
| Total cost (% overall)                                  | 404 688 057 (48.2)           | 68 376 530 (75.6)       | 70 544 097 (57.9)    | 13 099 506 (46.7)        | 33 405 676 (28.6)       | 51 036 692 (56.7)       | 168 225 556 (43)     |
| Median (IQR)                                            | 4607 (1364–18 706)           | 34 574 (10 178–97 063)  | 5685 (1765–17 657)   | 33 196 (11 728–133 025)  | 6854 (2024–25 010)      | 19 618 (4371–69 389)    | 2761 (1119–12 013)   |
| Index hospitalization acute care cost (facility + OHIP) |                              |                         |                      |                          |                         |                         |                      |
| No. of users (% cohort)                                 | 15 771 (100)                 | 873 (100)               | 3495 (100)           | 152 (100)                | 911 (100)               | 838 (100)               | 9502 (100)           |
| Total cost (% overall)                                  | 434 136 084 (51.8)           | 22 111 417 (24.4)       | 51 314 591 (42.1)    | 14 936 745 (53.3)        | 83 292 128 (71.4)       | 39 032 372 (43.3)       | 223 448 831 (57)     |
| Median (IQR)                                            | 5964 (2995–20 099)           | 5881 (3183–12 881)      | 3930 (2419–10 440)   | 18 006 (4769–152 232)    | 54 214 (9867–145 640)   | 9567 (3816–34 773)      | 5831 (3201–19 117)   |
| Acute care cost (facility + OHIP)                       |                              |                         |                      |                          |                         |                         |                      |
| No. of users (% cohort)                                 | 11 315 (71.7)                | 726 (83.2)              | 2662 (76.2)          | 137 (90.1)               | 656 (72)                | 727 (86.8)              | 6407 (67.4)          |
| Total cost (% overall)                                  | 228 256 216 (27.2)           | 21 247 266 (23.5)       | 37 043 903 (30.4)    | 5 401 283 (19.3)         | 23 290 226 (20)         | 26 253 829 (29.1)       | 115 019 709 (29.4)   |
| Median (IQR)                                            | 3545 (54–15 362)             | 9252 (2592–28 731)      | 2416 (54–10 497)     | 15 934 (4304–42 821)     | 5722 (1588–25 351)      | 9971 (1882–32 924)      | 3148 (54–13 349)     |
| ED cost (facility + OHIP)                               |                              |                         |                      |                          |                         |                         |                      |
| No. of users (% cohort)                                 | 11 172 (70.8)                | 726 (83.2)              | 2548 (72.9)          | 128 (84.2)               | 669 (73.4)              | 626 (74.7)              | 6475 (68.1)          |
| Total cost (% overall)                                  | 2 988 381 (0.4)              | 256 990 (0.3)           | 755 852 (0.6)        | 39 753 (0.1)             | 207 443 (0.2)           | 176 603 (0.2)           | 1 531 740 (0.4)      |
| Median (IQR)                                            | 165 (67–333)                 | 234 (100–448)           | 182 (68–371)         | 193 (81–432)             | 187 (85–394)            | 184 (69–339)            | 147 (64–304)         |
| SDS cost                                                |                              |                         |                      |                          |                         |                         |                      |
| No. of users (% cohort)                                 | 2685 (17)                    | 194 (22.2)              | 671 (19.2)           | 42 (27.6)                | 157 (17.2)              | 208 (24.8)              | 1413 (14.9)          |
| Total cost (% overall)                                  | 3 935 249 (0.5)              | 234 705 (0.3)           | 834 404 (0.7)        | 51 894 (0.2)             | 224 455 (0.2)           | 426 359 (0.5)           | 2 163 431 (0.6)      |
| Median (IQR)                                            | 1225 (613–1545)              | 1225 (601–1496)         | 1225 (613–1376)      | 1168 (601–1547)          | 1149 (613–1545)         | 1251 (613–1787)         | 1202 (613–1547)      |
| HC cost                                                 |                              |                         |                      |                          |                         |                         |                      |
| No. of users (% cohort)                                 | 5696 (36.1)                  | 708 (81.1)              | 1757 (50.3)          | 111 (73)                 | 363 (39.8)              | 539 (64.3)              | 2218 (23.3)          |
| Total cost (% overall)                                  | 94 460 536 (11.3)            | 36 238 239 (40)         | 18 379 958 (15.1)    | 5 841 371 (20.8)         | 4 381 529 (3.8)         | 15 797 027 (17.5)       | 13 822 412 (3.5)     |

SUPPLEMENTAL TABLE 4 Continued

|                                                               | NI                      |                          |                        | Multiple CCC           |                           |                           | Single CCC             |       |  |
|---------------------------------------------------------------|-------------------------|--------------------------|------------------------|------------------------|---------------------------|---------------------------|------------------------|-------|--|
|                                                               | Overall                 | TA                       | No TA                  | TA                     | No TA                     | TA                        | No TA                  | No TA |  |
|                                                               | n = 15 771              | n = 873                  | n = 3495               | n = 152                | n = 911                   | n = 838                   | n = 9502               |       |  |
| Median (IQR)<br>Other OHIP cost (eg,<br>ambulatory<br>visits) | 3130 (1272–9020)        | 13 112 (3063–51 255)     | 3345 (1448–8467)       | 7207 (2189–93 777)     | 3530 (1379–7484)          | 3648 (1296–17 054)        | 2117 (1050–5073)       |       |  |
| No. of users<br>(% cohort)                                    | 15 548 (98.6)           | 868 (99.4)               | 3427 (98.1)            | 148 (97.4)             | 894 (98.1)                | 823 (98.2)                | 9388 (98.8)            |       |  |
| Total cost<br>(% overall)                                     | 50 169 623 (6)          | 3 514 952 (3.9)          | 9 312 449 (7.6)        | 901 845 (3.2)          | 3 571 092 (3.1)           | 4 371 696 (4.9)           | 28 497 588 (7.3)       |       |  |
| Median (IQR)<br>ODB cost                                      | 1744 (972–3405)         | 2657 (1469–5064)         | 1664 (906–3198)        | 4593 (2499–7956)       | 2448 (1436–4563)          | 3127 (1727–6382)          | 1575 (903–2947)        |       |  |
| No. of users<br>(% cohort)                                    | 5050 (32)               | 570 (65.3)               | 1329 (38)              | 105 (69.1)             | 327 (35.9)                | 448 (53.5)                | 2271 (23.9)            |       |  |
| Total cost<br>(% overall)                                     | 22 408 103 (2.7)        | 5 518 253 (6.1)          | 3 995 951 (3.3)        | 817 935 (2.9)          | 1 423 171 (1.2)           | 3 496 913 (3.9)           | 7 155 880 (1.8)        |       |  |
| Median (IQR)<br>Other costs <sup>a</sup>                      | 864 (165–4548)          | 5547 (887–13 215)        | 860 (195–3514)         | 2900 (486–10 432)      | 1123 (205–4213)           | 2272 (388–9584)           | 454 (96–2577)          |       |  |
| Total cost<br>(% overall)                                     | 2 489 951 (0.3)         | 1 366 124 (1.5)          | 221 580 (0.2)          | 45 426 (0.2)           | 307 758 (0.3)             | 514 266 (0.6)             | 34 796 (0)             |       |  |
| Median (IQR)                                                  | 80 988 (22 779–287 837) | 131 291 (16 351–403 228) | 26 980 (22 779–50 018) | 45 426 (45 426–45 426) | 307 758 (307 758–307 758) | 257 135 (113 010–401 256) | 17 398 (10 875–23 922) |       |  |

All costs rounded to nearest dollar and are expressed in Canadian dollars.

HC, home care; IQR, interquartile range; ODB, Ontario Drug Benefit Plan; SDS, same-day surgery.

<sup>a</sup> For example, inpatient rehabilitation or complex continuing care.

**SUPPLEMENTAL TABLE 5** Common ICD-10 Diagnoses Among the 9502 Children With Single-Organ System CCCs Without TA and Without NI

| CCC Chapter                   | <i>n</i> (%) of All Single CCCs Without TA | Three Most Common Diagnoses Within Chapter                                                                                                         | <i>n</i> (%) With Multiple Diagnoses Within Chapter |
|-------------------------------|--------------------------------------------|----------------------------------------------------------------------------------------------------------------------------------------------------|-----------------------------------------------------|
| Cardiovascular                | 3541 (31.4)                                | Patent ductus arteriosus (Q250), Atrial septal defect (Q211), Ventricular septal defect (Q210)                                                     | 1010 (28.5)                                         |
| Respiratory                   | 751 (7.9)                                  | Congenital laryngomalacia (Q315), Bronchopulmonary dysplasia (P271), Cystic fibrosis (E840/E849)                                                   | 42 (5.6)                                            |
| Renal                         | 1260 (13.3)                                | Congenital hydronephrosis (Q620), Other specified congenital malformation of kidney (Q638), Congenital vesicoureteral reflux (Q627)                | 252 (20)                                            |
| Gastrointestinal              | 616 (6.5)                                  | Inflammatory bowel disease (K519/K509/K508), Hirschsprung disease (Q431), Inflammatory liver disease (K759)                                        | 44 (7.1)                                            |
| Hematology                    | 593 (6.2)                                  | Sickle cell anemia (D570/D571), Anemia due to glucose-6-phosphate dehydrogenase deficiency (D550), Hereditary spherocytosis (D580)                 | 18 (3.0)                                            |
| Congenital or genetic defects | 952 (10)                                   | Carniosynostosis (Q750), Congenital malformation syndromes predominantly affecting facial appearance (Q870), Gastroschisis (Q793)                  | 36 (3.8)                                            |
| Metabolic                     | 335 (3.5)                                  | Disorders of calcium metabolism (E835), Disorders of phosphorus metabolism and phosphatases (E833), Other disorders of bilirubin metabolism (E806) | 16 (4.8)                                            |
| Malignancies                  | 1454 (15.3)                                | Acute lymphoblastic leukemia (C910), Haemangioma of other sites (D1808), Malignant neoplasm of kidney, except renal pelvis (C64)                   | 164 (11.3)                                          |
